# Supplementary material for: Solvent-bridged frameworks of hydrogen bonds in crystals of 9-aminoacridinium halides
Source: Royal Society of Chemistry journal article supplement (doi:10.1039/c3ce41027g), 2013-01-01
Supplement: c3ce41027g.pdf [file c3ce41027g.pdf]

Supplementary Material (ESI) for *CrystEngComm*

Electronic Supplementary Information to the paper:

**Solvent-bridged frameworks of hydrogen bonds in crystals of**

**9-aminoacridinium halides**

**Damian Trzybiński and Artur Sikorski\***

Faculty of Chemistry, University of Gdańsk, J. Sobieskiego 18 , 80-952 Gdańsk, Poland. Tel:  
+48 58 523 5425;

\* to whom correspondence should be addressed; E-mail: [art@chem.univ.gda.pl](mailto:art@chem.univ.gda.pl)

Supplementary Material (ESI) for *CrystEngComm*

**Table S1.**  $\pi$ - $\pi$  interactions (distances in Å and angles in degrees) in **1**.

| CgI <sup>a</sup> | CgJ <sup>a</sup> | Cg $\cdots$ Cg <sup>b</sup> | Dihedral angle <sup>c</sup> | Interplanar distance <sup>d</sup> | Offset <sup>e</sup> |
|------------------|------------------|-----------------------------|-----------------------------|-----------------------------------|---------------------|
| 1                | 1 <sup>v</sup>   | 4.052(1)                    | 0.0(1)                      | 3.428(1)                          | 2.160(1)            |
| 1                | 2 <sup>vi</sup>  | 3.709(1)                    | 0.9(1)                      | 3.431(1)                          | 1.409(1)            |
| 1                | 3 <sup>v</sup>   | 3.816(1)                    | 1.1(1)                      | 3.451(1)                          | 1.629(1)            |
| 2                | 2 <sup>vi</sup>  | 3.577(1)                    | 0.0(1)                      | 3.410(1)                          | 1.080(1)            |
| 3                | 2 <sup>v</sup>   | 4.007(1)                    | 1.1(1)                      | 3.470(1)                          | 2.109(1)            |

Symmetry code: (v) 1-x, 1-y, 1-z; (vi) 1-x, -y, 1-z.

<sup>a</sup>Cg represents the centre of gravity of the rings as follows (Figure S1): Cg1 ring C9/C11/C12/N10/C14/C13, Cg2 ring C1-C4/C12/C11, Cg3 ring C5-C8/C13/C14.

<sup>b</sup>Cg $\cdots$ Cg is the distance between ring centroids.

<sup>c</sup>The dihedral angle is that between the mean planes of CgI and CgJ.

<sup>d</sup>The interplanar distance is the perpendicular distance from CgI to ring J.

<sup>e</sup>The offset is the perpendicular distance from ring I to ring J.

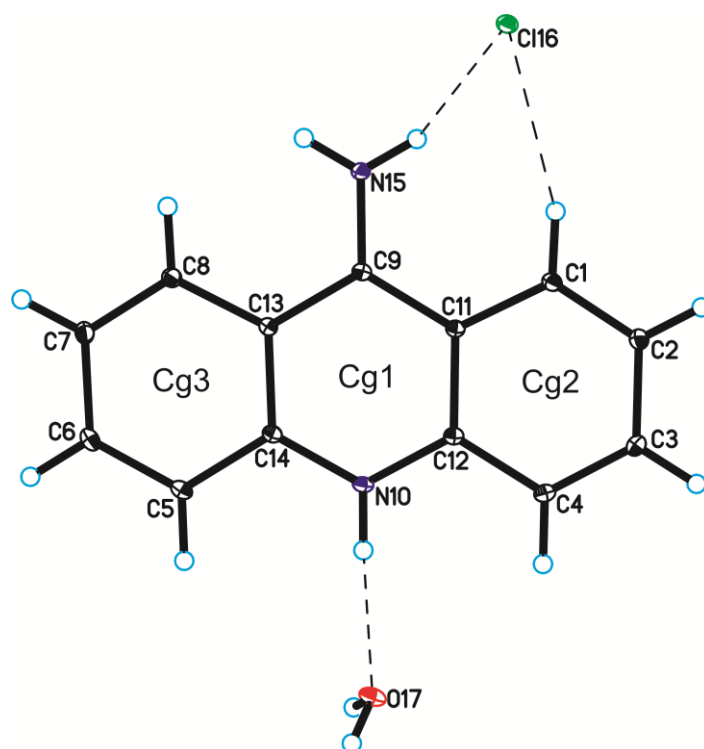

**Figure S1.** Molecular structure of compound **1** in the crystal showing the atom labelling scheme and 25% probability displacement ellipsoids (H atoms are spheres of arbitrary size). Cg1, Cg2 and Cg3 denote the ring centroids.

Supplementary Material (ESI) for *CrystEngComm*

**Table S2.**  $\pi$ - $\pi$  interactions (distances in Å and angles in degrees) in **2**.

| CgI <sup>a</sup> | CgJ <sup>a</sup> | Cg $\cdots$ Cg <sup>b</sup> | Dihedral angle <sup>c</sup> | Interplanar distance <sup>d</sup> | Offset <sup>e</sup> |
|------------------|------------------|-----------------------------|-----------------------------|-----------------------------------|---------------------|
| 1                | 1 <sup>v</sup>   | 4.150(2)                    | 0.0(2)                      | 3.460(2)                          | 2.291(2)            |
| 1                | 2 <sup>vi</sup>  | 3.871(2)                    | 0.8(2)                      | 3.445(2)                          | 1.765(2)            |
| 1                | 3 <sup>v</sup>   | 3.838(2)                    | 0.6(2)                      | 3.468(2)                          | 1.644(2)            |
| 2                | 2 <sup>vi</sup>  | 3.560(2)                    | 0.0(2)                      | 3.450(2)                          | 0.878(2)            |
| 3                | 2 <sup>v</sup>   | 4.095(2)                    | 0.9(2)                      | 3.475(2)                          | 2.166(2)            |

Symmetry code: (v) 1-x, 1-y, 1-z; (vi) 1-x, 2-y, 1-z.

<sup>a</sup>Cg represents the centre of gravity of the rings (Figure S2).

<sup>b</sup>Cg $\cdots$ Cg is the distance between ring centroids.

<sup>c</sup>The dihedral angle is that between the mean planes of CgI and CgJ.

<sup>d</sup>The interplanar distance is the perpendicular distance from CgI to ring J.

<sup>e</sup>The offset is the perpendicular distance from ring I to ring J.

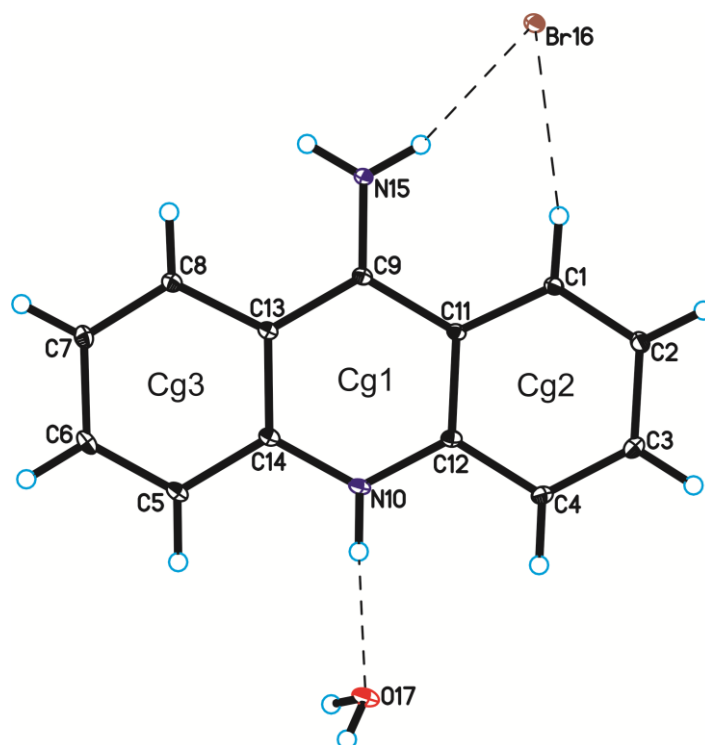

**Figure S2.** Molecular structure of compound **2** in the crystal showing the atom labelling scheme and 25% probability displacement ellipsoids (H atoms are spheres of arbitrary size). Cg1, Cg2 and Cg3 denote the ring centroids.

Supplementary Material (ESI) for *CrystEngComm*

**Table S3.**  $\pi$ - $\pi$  interactions (distances in Å and angles in degrees) in **3**.

| CgI <sup>a</sup> | CgJ <sup>a</sup> | Cg $\cdots$ Cg <sup>b</sup> | Dihedral angle <sup>c</sup> | Interplanar distance <sup>d</sup> | Offset <sup>e</sup> |
|------------------|------------------|-----------------------------|-----------------------------|-----------------------------------|---------------------|
| 1                | 1 <sup>iv</sup>  | 3.655(3)                    | 0.0(2)                      | 3.391(2)                          | 1.364(2)            |
| 1                | 3 <sup>iv</sup>  | 3.579(3)                    | 2.3(2)                      | 3.392(2)                          | 1.327(2)            |
| 2                | 1 <sup>iv</sup>  | 3.733(3)                    | 3.0(2)                      | 3.429(2)                          | 1.142(2)            |
| 3                | 3 <sup>iv</sup>  | 4.093(3)                    | 0.0(2)                      | 3.345(2)                          | 2.358(2)            |

Symmetry code: (iv)  $x, 1/2-y, 1/2+z$ .

<sup>a</sup>Cg represents the centre of gravity of the rings (Figure S3).

<sup>b</sup>Cg $\cdots$ Cg is the distance between ring centroids.

<sup>c</sup>The dihedral angle is that between the mean planes of CgI and CgJ.

<sup>d</sup>The interplanar distance is the perpendicular distance from CgI to ring J.

<sup>e</sup>The offset is the perpendicular distance from ring I to ring J.

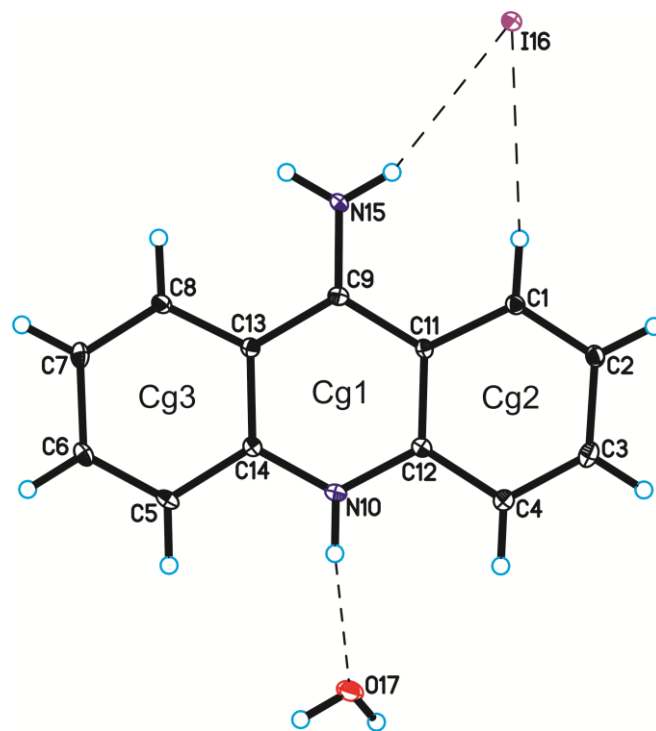

**Figure S3.** Molecular structure of compound **3** in the crystal showing the atom labelling scheme and 25% probability displacement ellipsoids (H atoms are spheres of arbitrary size). Cg1, Cg2 and Cg3 denote the ring centroids.

Supplementary Material (ESI) for *CrystEngComm*

**Table S4.**  $\pi$ - $\pi$  interactions (distances in Å and angles in degrees) in **4**.

| CgI <sup>a</sup> | CgJ <sup>a</sup> | Cg...Cg <sup>b</sup> | Dihedral angle <sup>c</sup> | Interplanar distance <sup>d</sup> | Offset <sup>e</sup> |
|------------------|------------------|----------------------|-----------------------------|-----------------------------------|---------------------|
| 1                | 1 <sup>iii</sup> | 4.183(1)             | 0.0(1)                      | 3.465(1)                          | 2.343(1)            |
| 1                | 1 <sup>iv</sup>  | 3.670(1)             | 0.0(1)                      | 3.403(1)                          | 1.374(1)            |
| 1                | 3 <sup>iii</sup> | 3.636(1)             | 0.5(1)                      | 3.448(1)                          | 1.154(1)            |
| 1                | 3 <sup>iv</sup>  | 3.635(1)             | 0.5(1)                      | 3.407(1)                          | 1.267(1)            |
| 2                | 3 <sup>iii</sup> | 4.107(1)             | 2.7(1)                      | 3.404(1)                          | 2.298(1)            |
| 2                | 3 <sup>iv</sup>  | 3.730(1)             | 2.7(1)                      | 3.451(1)                          | 1.415(1)            |

Symmetry code: (iii)  $-x, 2-y, 1-z$ ; (iv)  $1-x, 2-y, 1-z$ .

<sup>a</sup>Cg represents the centre of gravity of the rings (Figure S4).

<sup>b</sup>Cg...Cg is the distance between ring centroids.

<sup>c</sup>The dihedral angle is that between the mean planes of CgI and CgJ.

<sup>d</sup>The interplanar distance is the perpendicular distance from CgI to ring J.

<sup>e</sup>The offset is the perpendicular distance from ring I to ring J.

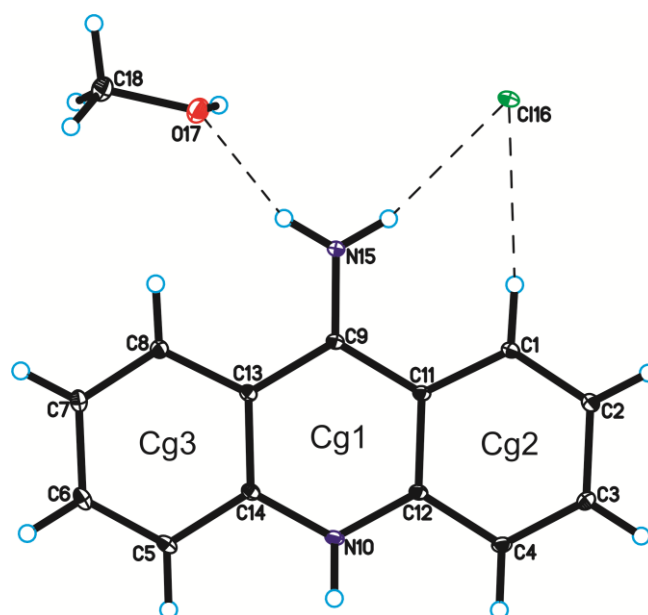

**Figure S4.** Molecular structure of compound **4** in the crystal showing the atom labelling scheme and 25% probability displacement ellipsoids (H atoms are spheres of arbitrary size). Cg1, Cg2 and Cg3 denote the ring centroids.

Supplementary Material (ESI) for *CrystEngComm*

**Table S5.**  $\pi$ - $\pi$  interactions (distances in Å and angles in degrees) in **5**.

| CgI <sup>a</sup> | CgJ <sup>a</sup> | Cg...Cg <sup>b</sup> | Dihedral angle <sup>c</sup> | Interplanar distance <sup>d</sup> | Offset <sup>e</sup> |
|------------------|------------------|----------------------|-----------------------------|-----------------------------------|---------------------|
| 1                | 1 <sup>iii</sup> | 3.686(3)             | 0.0(2)                      | 3.460(2)                          | 1.271(2)            |
| 1                | 1 <sup>iv</sup>  | 4.165(3)             | 0.0(2)                      | 3.460(2)                          | 2.319(2)            |
| 1                | 3 <sup>iii</sup> | 3.662(3)             | 0.7(2)                      | 3.445(2)                          | 1.242(2)            |
| 1                | 3 <sup>iv</sup>  | 3.671(3)             | 0.7(2)                      | 3.445(2)                          | 1.268(2)            |
| 2                | 3 <sup>iii</sup> | 3.756(3)             | 2.6(2)                      | 3.468(2)                          | 1.442(2)            |
| 2                | 3 <sup>iv</sup>  | 4.083(3)             | 2.6(2)                      | 3.468(2)                          | 2.155(2)            |

Symmetry code: (iii) 1-x, 1-y, 1-z ; (iv) 2-x, 1-y, 1-z.

<sup>a</sup>Cg represents the centre of gravity of the rings (Figure S5).

<sup>b</sup>Cg...Cg is the distance between ring centroids.

<sup>c</sup>The dihedral angle is that between the mean planes of CgI and CgJ.

<sup>d</sup>The interplanar distance is the perpendicular distance from CgI to ring J.

<sup>e</sup>The offset is the perpendicular distance from ring I to ring J.

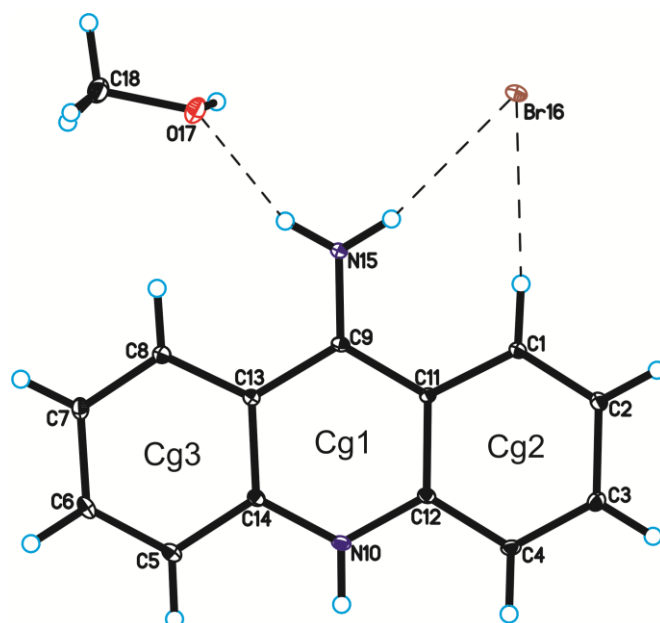

**Figure S5.** Molecular structure of compound **5** in the crystal showing the atom labelling scheme and 25% probability displacement ellipsoids (H atoms are spheres of arbitrary size). Cg1, Cg2 and Cg3 denote the ring centroids.

Supplementary Material (ESI) for *CrystEngComm*

**Table S6.**  $\pi$ - $\pi$  interactions (distances in Å and angles in degrees) in **6**.

| CgI <sup>a</sup> | CgJ <sup>a</sup> | Cg $\cdots$ Cg <sup>b</sup> | Dihedral angle <sup>c</sup> | Interplanar distance <sup>d</sup> | Offset <sup>e</sup> |
|------------------|------------------|-----------------------------|-----------------------------|-----------------------------------|---------------------|
| 1                | 1 <sup>ii</sup>  | 3.713(4)                    | 0.0(3)                      | 3.465(2)                          | 1.334(2)            |
| 1                | 3 <sup>ii</sup>  | 3.890(4)                    | 1.9(3)                      | 3.452(2)                          | 1.793(2)            |
| 2                | 1 <sup>ii</sup>  | 3.656(4)                    | 0.3(3)                      | 3.448(2)                          | 1.216(2)            |
| 2                | 2 <sup>ii</sup>  | 3.939(4)                    | 0.0(3)                      | 3.464(2)                          | 1.875(2)            |

Symmetry code: (ii)  $x, 1/2-y, -1/2+z$ .

<sup>a</sup>Cg represents the centre of gravity of the rings (Figure S6).

<sup>b</sup>Cg $\cdots$ Cg is the distance between ring centroids.

<sup>c</sup>The dihedral angle is that between the mean planes of CgI and CgJ.

<sup>d</sup>The interplanar distance is the perpendicular distance from CgI to ring J.

<sup>e</sup>The offset is the perpendicular distance from ring I to ring J.

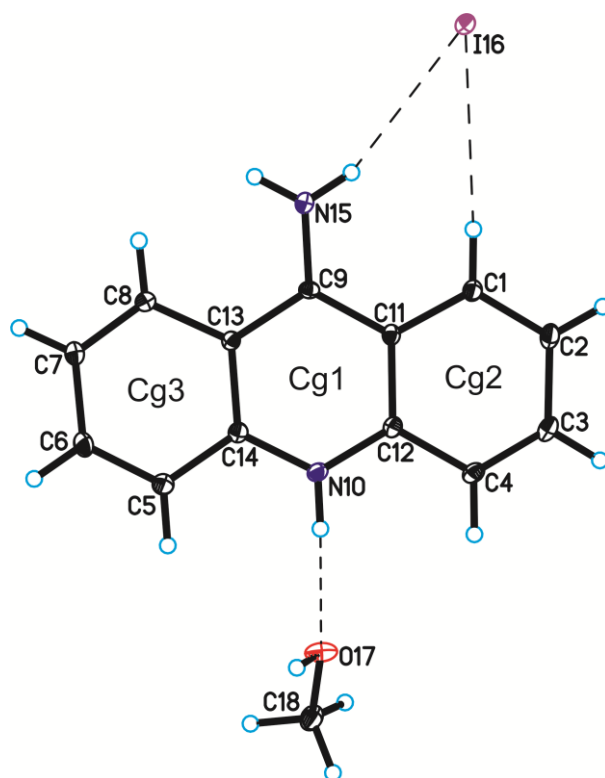

**Figure S6.** Molecular structure of compound **6** in the crystal showing the atom labelling scheme and 25% probability displacement ellipsoids (H atoms are spheres of arbitrary size). Cg1, Cg2 and Cg3 denote the ring centroids.

Supplementary Material (ESI) for *CrystEngComm*

**Table S 7.**  $\pi$ - $\pi$  interactions (distances in Å and angles in degrees) in **7**.

| CgI <sup>a</sup> | CgJ <sup>a</sup> | Cg $\cdots$ Cg <sup>b</sup> | Dihedral angle <sup>c</sup> | Interplanar distance <sup>d</sup> | Offset <sup>e</sup> |
|------------------|------------------|-----------------------------|-----------------------------|-----------------------------------|---------------------|
| 1                | 1 <sup>iii</sup> | 3.794(1)                    | 0.0(1)                      | 3.409(1)                          | 1.596(2)            |
| 1                | 2 <sup>iii</sup> | 3.572(1)                    | 0.9(1)                      | 3.415(1)                          | 1.047(2)            |
| 2                | 2 <sup>iii</sup> | 3.814(1)                    | 0.0(1)                      | 3.433(1)                          | 1.662(2)            |

Symmetry code: (iii)  $x, 1-y, 1/2+z$ .

<sup>a</sup>Cg represents the centre of gravity of the rings (Figure S7).

<sup>b</sup>Cg $\cdots$ Cg is the distance between ring centroids.

<sup>c</sup>The dihedral angle is that between the mean planes of CgI and CgJ.

<sup>d</sup>The interplanar distance is the perpendicular distance from CgI to ring J.

<sup>e</sup>The offset is the perpendicular distance from ring I to ring J.

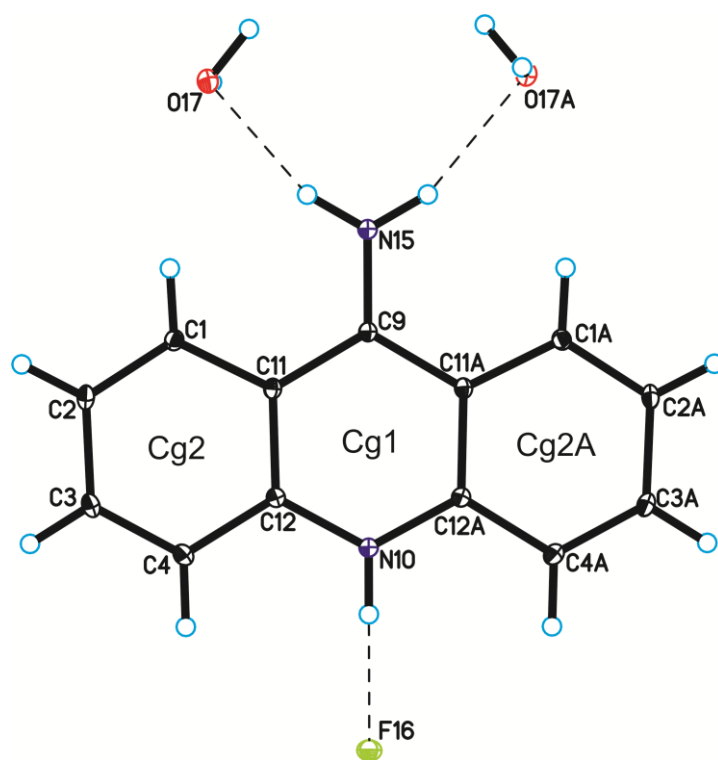

**Figure S7.** Molecular structure of compound **7** in the crystal showing the atom labelling scheme and 25% probability displacement ellipsoids (H atoms are spheres of arbitrary size). Cg1, Cg2 and Cg3 denote the ring centroids.



Supplementary Material (ESI) for *CrystEngComm*

**Table S8.**  $\pi$ - $\pi$  interactions (distances in Å and angles in degrees) in **8**.

| CgI <sup>a</sup> | CgJ <sup>a</sup> | Cg $\cdots$ Cg <sup>b</sup> | Dihedral angle <sup>c</sup> | Interplanar distance <sup>d</sup> | Offset <sup>e</sup> |
|------------------|------------------|-----------------------------|-----------------------------|-----------------------------------|---------------------|
| 1                | 1 <sup>v</sup>   | 3.523(3)                    | 0.0(2)                      | 3.421(2)                          | 0.842(2)            |
| 1                | 3 <sup>v</sup>   | 3.820(3)                    | 3.3(2)                      | 3.422(2)                          | 1.698(2)            |
| 2                | 1 <sup>v</sup>   | 3.888(3)                    | 3.7(2)                      | 3.500(2)                          | 1.693(2)            |
| 2                | 2 <sup>v</sup>   | 4.181(3)                    | 0.0(2)                      | 3.502(2)                          | 2.284(2)            |
| 3                | 3 <sup>v</sup>   | 3.979(3)                    | 0.0(2)                      | 3.373(2)                          | 2.111(2)            |

Symmetry code: (v)  $1/2-x, 1/2+y, z$ .

<sup>a</sup>Cg represents the centre of gravity of the rings as follows (Figure S8).

<sup>b</sup>Cg $\cdots$ Cg is the distance between ring centroids.

<sup>c</sup>The dihedral angle is that between the mean planes of CgI and CgJ.

<sup>d</sup>The interplanar distance is the perpendicular distance from CgI to ring J.

<sup>e</sup>The offset is the perpendicular distance from ring I to ring J.

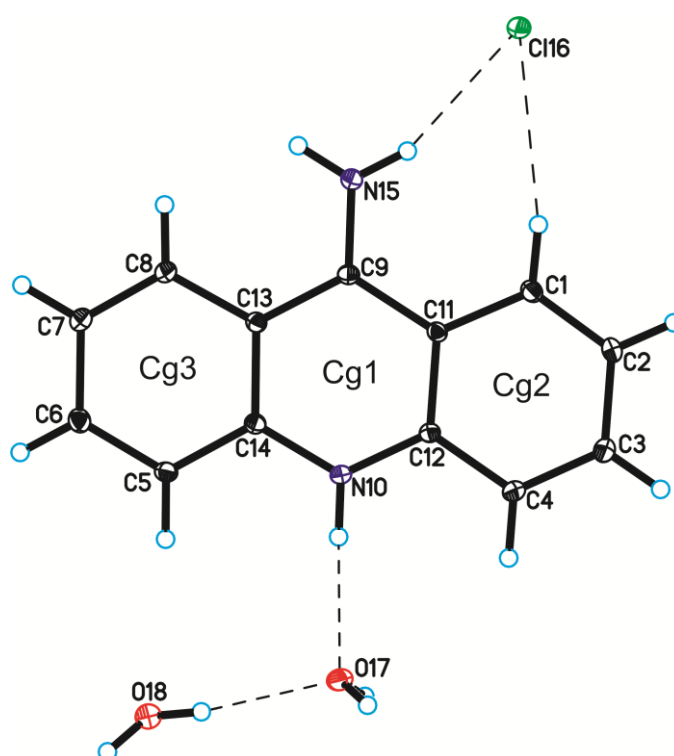

**Figure S8.** Molecular structure of compound **8** in the crystal showing the atom labelling scheme and 25% probability displacement ellipsoids (H atoms are spheres of arbitrary size). Cg1, Cg2 and Cg3 denote the ring centroids.
